# Supplementary material
Source: HighWire-hosted journal article supplement (https://ijgc.bmj.com/highwire/filestream/28356/field_highwire_adjunct_files/4/ijgc-2022-004026supp005_data_supplement.pdf)
Supplement: ijgc-2022-004026supp005_data_supplement.pdf [file ijgc-2022-004026supp005_data_supplement.pdf]

# Supplemental Table 1

## Characteristics of patients with both MSI and dMMR IHC testing receiving ICI therapy in any line.

Acronyms: MSI-H, microsatellite instability high; MSS, microsatellite stable; ICI, immune checkpoint inhibitor; NOS, not otherwise specified; ECOG, Eastern Cooperative Oncology Group; dMMR, deficient mismatch repair; IHC, immunohistochemistry; TMB, tumor mutational burden; NGS, next generation sequencing; PDL1, programmed death-ligand 1; TPS, tumor proportion score; BMI, body mass index

|                           | MSI-H (N=38)      | MSS (N=32)        | Total (N=70)      | p value |
|---------------------------|-------------------|-------------------|-------------------|---------|
| Age at Therapy Start      |                   |                   |                   | 0.6     |
| Median (Q1, Q3)           | 69.0 (61.0, 74.0) | 70.5 (62.0, 75.0) | 70.0 (62.0, 74.8) |         |
| Practice Type             |                   |                   |                   | 0.378   |
| Academic                  | 17 (44.7%)        | 11 (34.4%)        | 28 (40.0%)        |         |
| Community                 | 21 (55.3%)        | 21 (65.6%)        | 42 (60.0%)        |         |
| Stage at Diagnosis        |                   |                   |                   | 0.57    |
| Stage I                   | 17 (44.7%)        | 10 (31.2%)        | 27 (38.6%)        |         |
| Stage II                  | 2 (5.3%)          | 1 (3.1%)          | 3 (4.3%)          |         |
| Stage III                 | 8 (21.1%)         | 10 (31.2%)        | 18 (25.7%)        |         |
| Stage IV                  | 10 (26.3%)        | 11 (34.4%)        | 21 (30.0%)        |         |
| Unknown/not documented    | 1 (2.6%)          | 0 (0.0%)          | 1 (1.4%)          |         |
| Histology                 |                   |                   |                   | < 0.001 |
| Carcinosarcoma            | 2 (5.3%)          | 4 (12.5%)         | 6 (8.6%)          |         |
| Endometrial cancer, NOS   | 3 (7.9%)          | 1 (3.1%)          | 4 (5.7%)          |         |
| Endometrioid carcinoma    | 30 (78.9%)        | 12 (37.5%)        | 42 (60.0%)        |         |
| Serous carcinoma          | 3 (7.9%)          | 15 (46.9%)        | 18 (25.7%)        |         |
| Race                      |                   |                   |                   | 0.003   |
| Black or African American | ≤6 (≤16%)         | 8 (25.0%)         | 8 (11.4%)         |         |
| Other Race                | ≤6 (≤16%)         | ≤6 (≤19%)         | 9 (12.9%)         |         |
| Unknown/not documented    | ≤6 (≤16%)         | ≤6 (≤19%)         | ≤6 (9%)           |         |
| White                     | 34 (89.5%)        | 18 (56.2%)        | 52 (74.3%)        |         |
| ECOG Score                |                   |                   |                   | 0.073   |
| 0                         | 10 (26.3%)        | 10 (31.2%)        | 20 (28.6%)        |         |
| 1                         | 10 (26.3%)        | 16 (50.0%)        | 26 (37.1%)        |         |
| 2+                        | 7 (18.4%)         | 2 (6.2%)          | 9 (12.9%)         |         |
| Unknown                   | 11 (28.9%)        | 4 (12.5%)         | 15 (21.4%)        |         |
| dMMR by IHC               |                   |                   |                   | < 0.001 |
| Loss                      | 37 (97.4%)        | 5 (15.6%)         | 42 (60.0%)        |         |
| Normal                    | 1 (2.6%)          | 27 (84.4%)        | 28 (40.0%)        |         |
| Opioid Use Pre-Therapy    |                   |                   |                   | 0.762   |
| No                        | 20 (52.6%)        | 18 (56.2%)        | 38 (54.3%)        |         |
| Yes                       | 18 (47.4%)        | 14 (43.8%)        | 32 (45.7%)        |         |
| ICI Line of tx            |                   |                   |                   | 0.708   |
| 1 <sup>st</sup>           | 12 (31.6%)        | 8 (25.0%)         | 20 (28.6%)        |         |
| 2 <sup>nd</sup>           | 12 (31.6%)        | 13 (40.6%)        | 25 (35.7%)        |         |
| 3 <sup>rd</sup> +         | 14 (36.8%)        | 11 (34.4%)        | 25 (35.7%)        |         |
| TMB                       |                   |                   |                   | < 0.001 |
| Median (Q1, Q3)           | 24.1 (16.6, 32.6) | 2.1 (1.3, 4.1)    | 12.5 (2.5, 25.7)  |         |
| PDL1                      |                   |                   |                   | 0.424   |
| TPS 0                     | 6 (15.8%)         | 4 (12.5%)         | 10 (14.3%)        |         |
| TPS 1-19                  | 1 (2.6%)          | 3 (9.4%)          | 4 (5.7%)          |         |
| TPS 20+                   | 0 (0.0%)          | 1 (3.1%)          | 1 (1.4%)          |         |
| unknown                   | 31 (81.6%)        | 24 (75.0%)        | 55 (78.6%)        |         |
| POLE Mutation             |                   |                   |                   | 0.473   |
| Negative                  | 38 (100.0%)       | 32 (100.0%)       | 70 (100.0%)       |         |
| TP53 Mutation             |                   |                   |                   | < 0.001 |
| Negative                  | 31 (81.6%)        | 9 (28.1%)         | 40 (57.1%)        |         |
| Positive                  | 7 (18.4%)         | 23 (71.9%)        | 30 (42.9%)        |         |
| CTNNB1 mutation           |                   |                   |                   | 0.095   |
| Negative                  | 24 (63.2%)        | 26 (81.2%)        | 50 (71.4%)        |         |
| Positive                  | 14 (36.8%)        | 6 (18.8%)         | 20 (28.6%)        |         |
| BMI                       |                   |                   |                   | 0.712   |
| Median (Q1, Q3)           | 28.9 (21.8, 38.5) | 27.2 (22.9, 36.0) | 27.3 (22.2, 37.6) |         |
| Missing Observations      | 7                 | 3                 | 10                |         |
